# Supplementary material for: Facile Fabrication of 1-Methylimidazole/Cu Nanozyme with Enhanced Laccase Activity for Fast Degradation and Sensitive Detection of Phenol Compounds
Source: MDPI journal article supplement (doi:10.3390/molecules27154712), 2022-07-23
Supplement: s1 [file s1]

# Supporting Information

## Facile fabrication of 1-methylimidazole/Cu nanozyme with enhanced laccase activity for fast degradation and sensitive detection of phenol compounds

Yu Lei <sup>a</sup>, Bin He <sup>a</sup>, Shujun Huang <sup>a</sup>, Xinyan Chen <sup>a</sup>, Jian Sun <sup>a,b,\*</sup>

<sup>a</sup> Key Laboratory of Molecular Medicine and Biotherapy in the Ministry of Industry and Information Technology, School of Life Science, Beijing Institute of Technology, Beijing 100081, P.R. China

<sup>b</sup> Advanced Research Institute of Multidisciplinary Science, Beijing Institute of Technology, Beijing 100081, P.R. China

\* Corresponding author. *E-mail address*: [jiansun@bit.edu.cn](mailto:jiansun@bit.edu.cn)

**Number of pages:** 8 pages

**Number of Figures:** 11

**Number of Tables:** 2

### Contents:

**Figure S1.** SEM images of nanozymes: (a) Cu-IM, (b) Cu-EIM, (c) Cu-PIM, and (d) Cu-BIM.

**Figure S2.** XRD patterns of nanozymes prepared in the current work.

**Figure S3.** FTIR spectrum: (a) Cu-IM, (b) Cu-EIM, (c) Cu-PIM, and (d) Cu-BIM.

**Figure S4.** (a)XPS fully scanned spectrum of the Cu-MIM nanozyme, (b) N<sub>2</sub> adsorption-desorption isotherms of different samples.

**Figure S5.** N 1s XPS spectrum: (a) Cu-IM, (b) Cu-MIM (c) Cu-EIM, (d) Cu-PIM, and (e) Cu-BIM.

**Figure S6.** Wavelengths of Cu-MIM catalyzed 2, 4-DP and 4-AP reaction (a), product absorbance versus time catalyzed by laccase or Cu-MIM (b), and comparison of reaction catalyzed by Cu-MIM or CuCl<sub>2</sub> for 20 min (c), (d) comparison of reaction catalyzed by Cu-MIM or 1-Methylimidazole.

**Figure S7.** Molecular structures of five phenolic compounds.

**Figure S8.** Lineweaver-Burk plot for Cu-MIM nanozyme and laccase oxidizing 2, 4-DP at room temperature.

**Figure S9.** Lineweaver-Burk plot for Cu-MIM nanozyme and laccase oxidizing phenol at room temperature.

**Figure S10.** Photographs of the reaction of different concentrations of phenol and Cu-MIM nanozymes.

**Figure S11.** The selectivity of Cu-MIM nanozyme towards phenol and other potential interferential substances.

**Table S1.** The FT-IR spectral summary of Cu-MIM nanozyme and 1-methylimidazole dipeptide.

**Table S2.** The RGB value corresponding to the standard color chart of each phenol concentration.

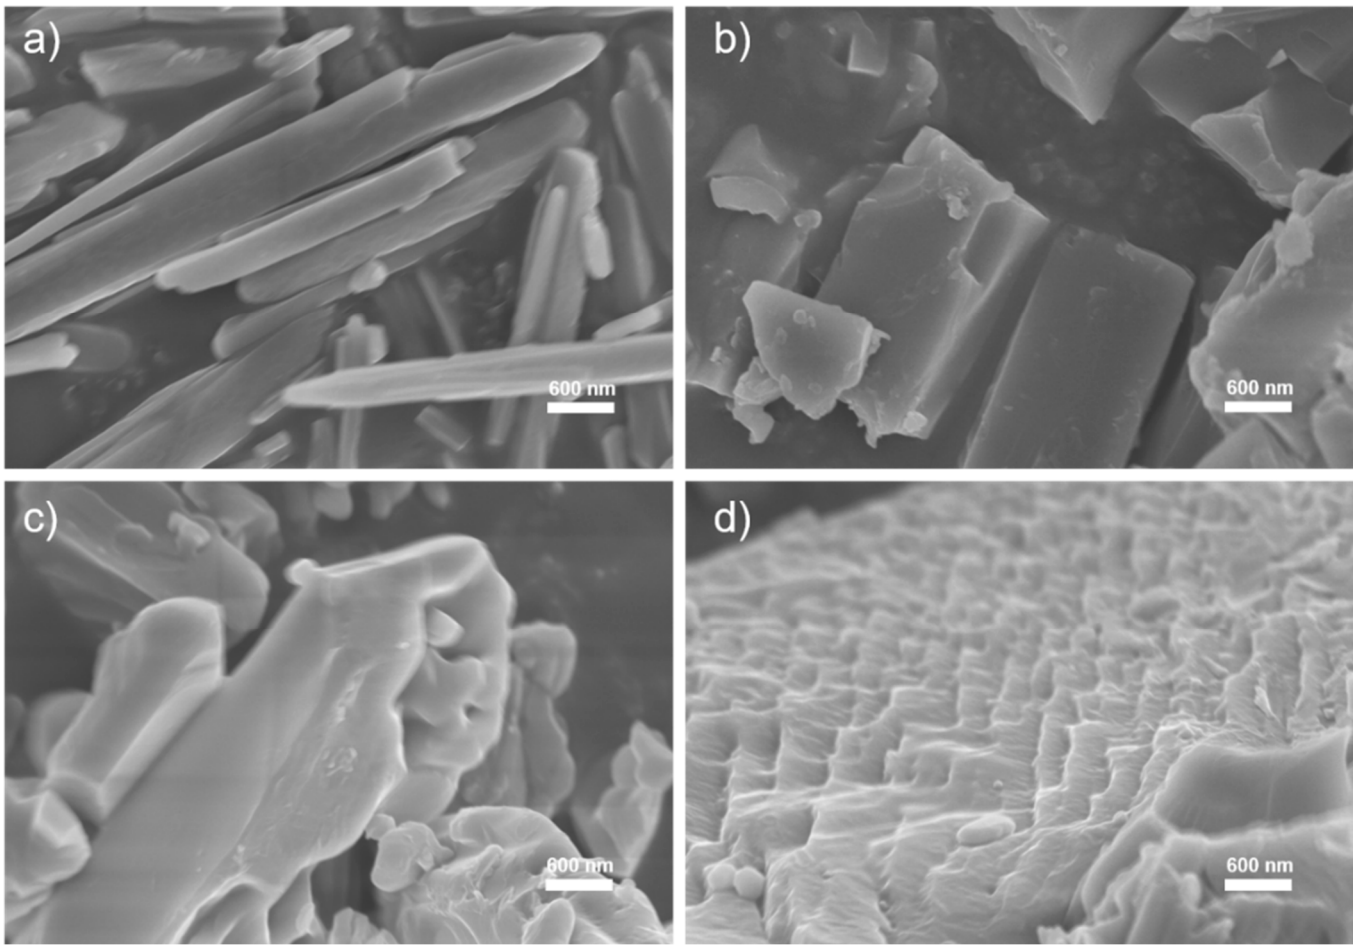

**Figure S1.** SEM images of nanozymes: (a) Cu-IM, (b) Cu-EIM, (c) Cu-PIM, and (d) Cu-BIM.

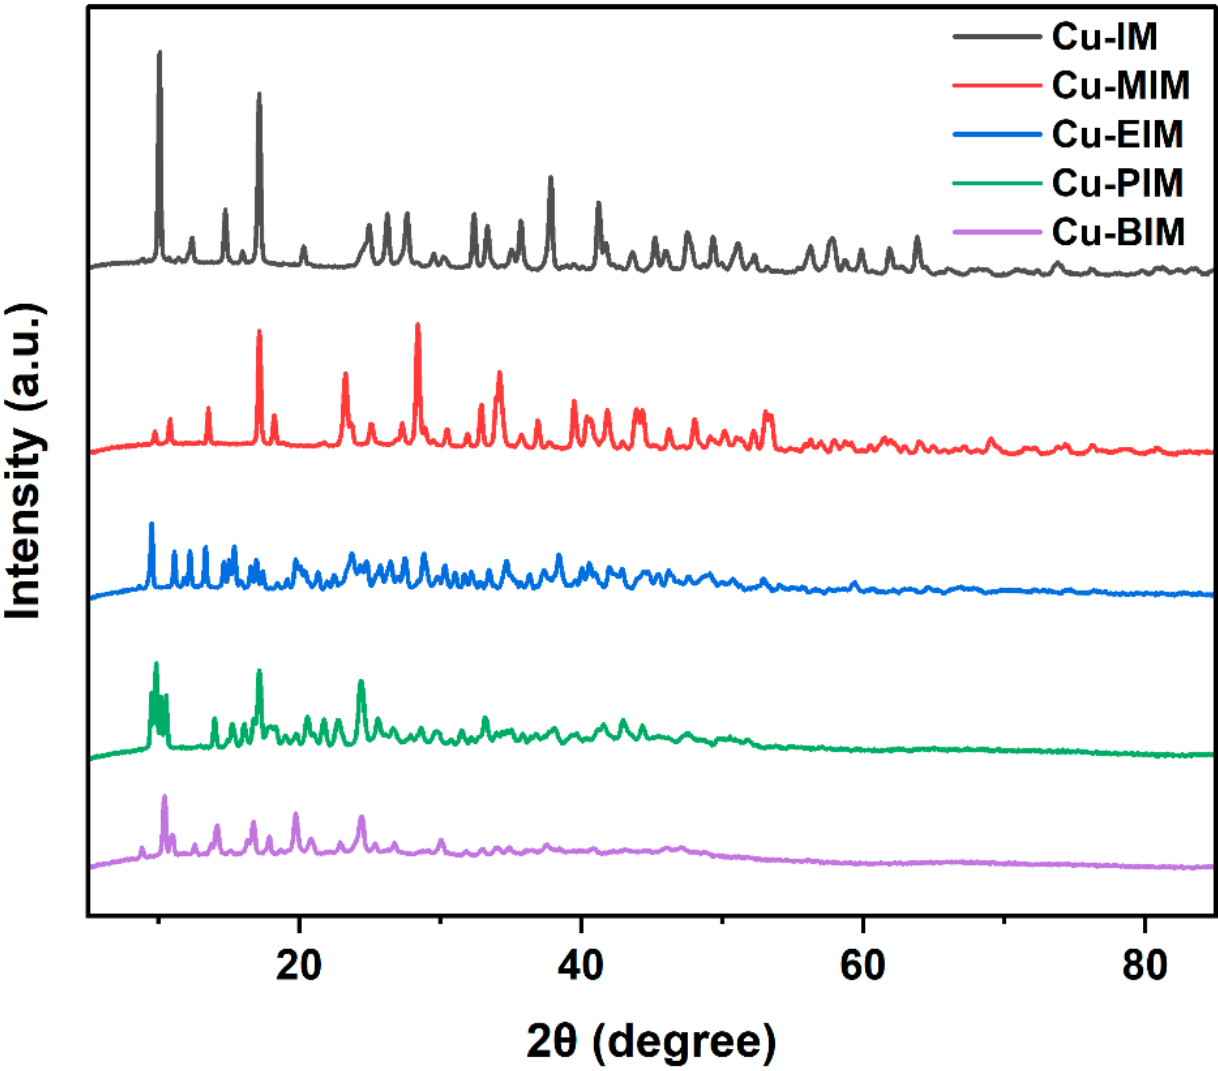

**Figure S2.** XRD patterns of nanozymes prepared in the current work.

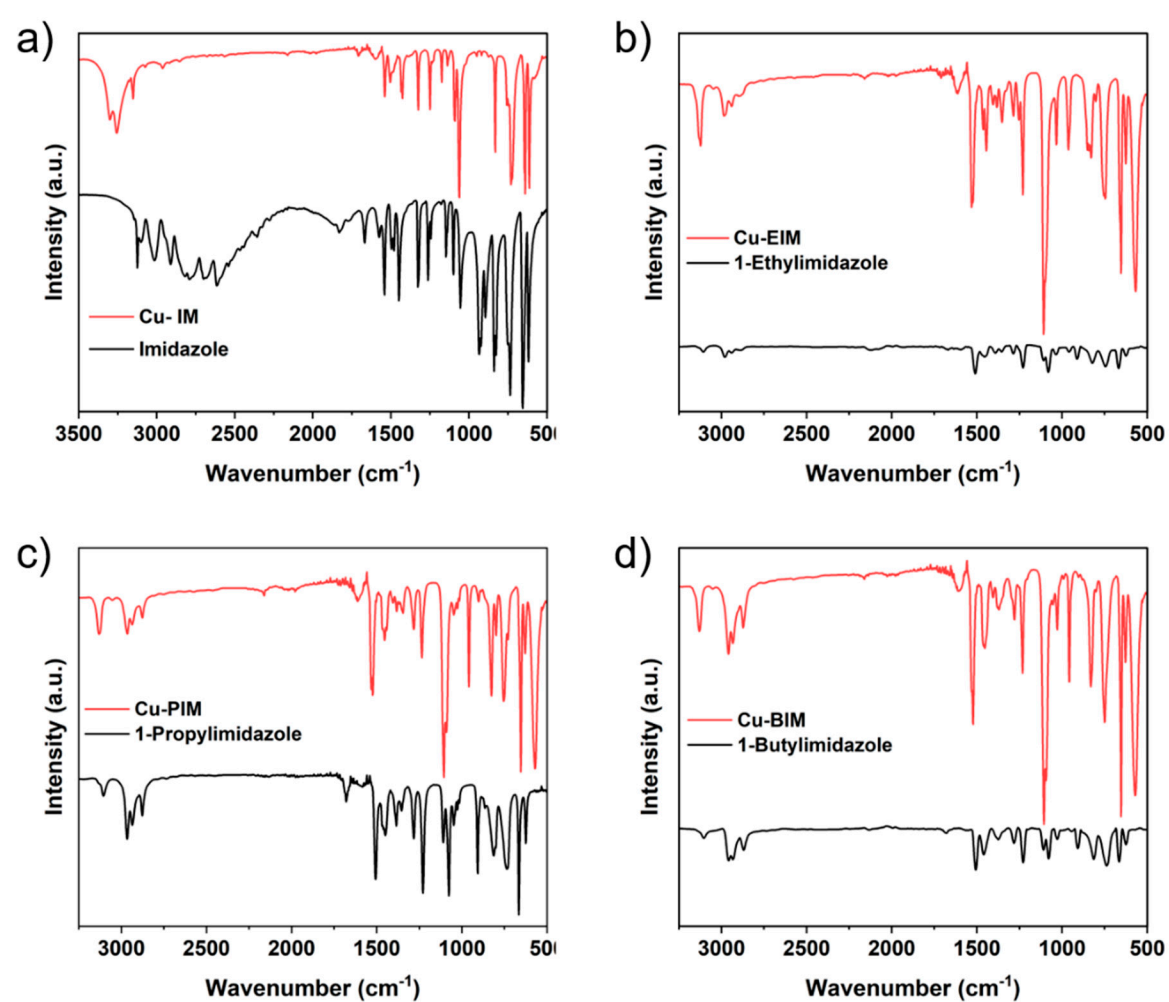

**Figure S3.** FTIR spectrum: (a) Cu-IM, (b) Cu-EIM, (c) Cu-PIM, and (d) Cu-BIM.

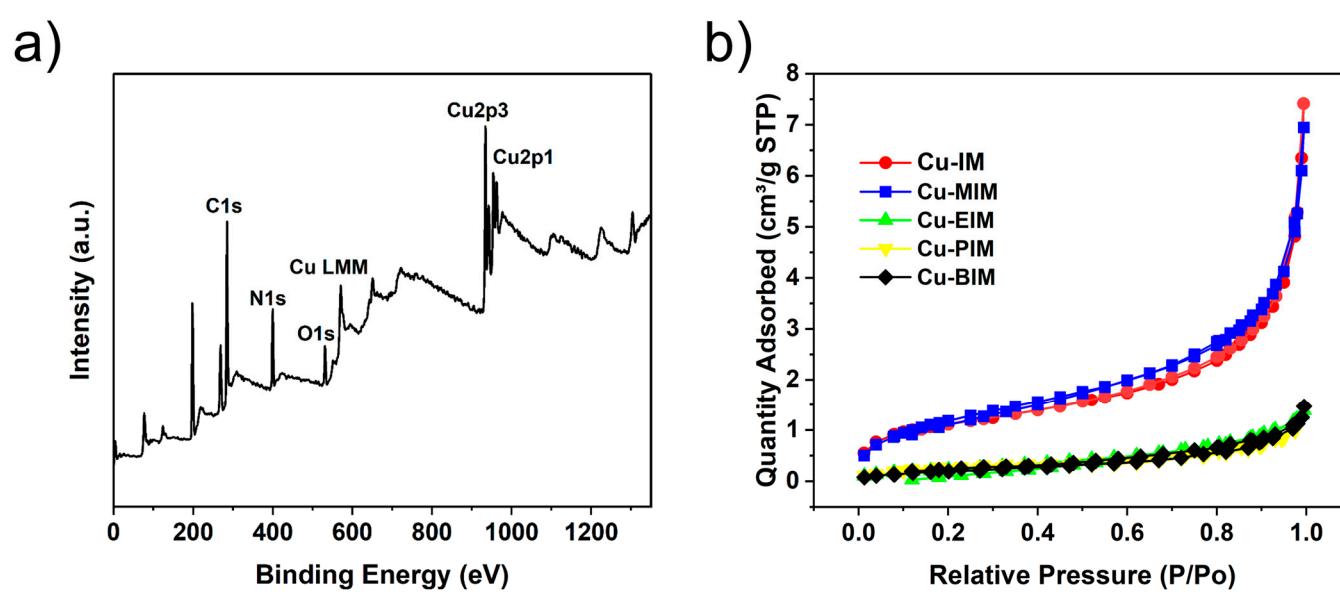

**Figure S4.** (a)XPS fully scanned spectrum of the Cu-MIM nanozyme, (b) N<sub>2</sub> adsorption-desorption isotherms of different samples.

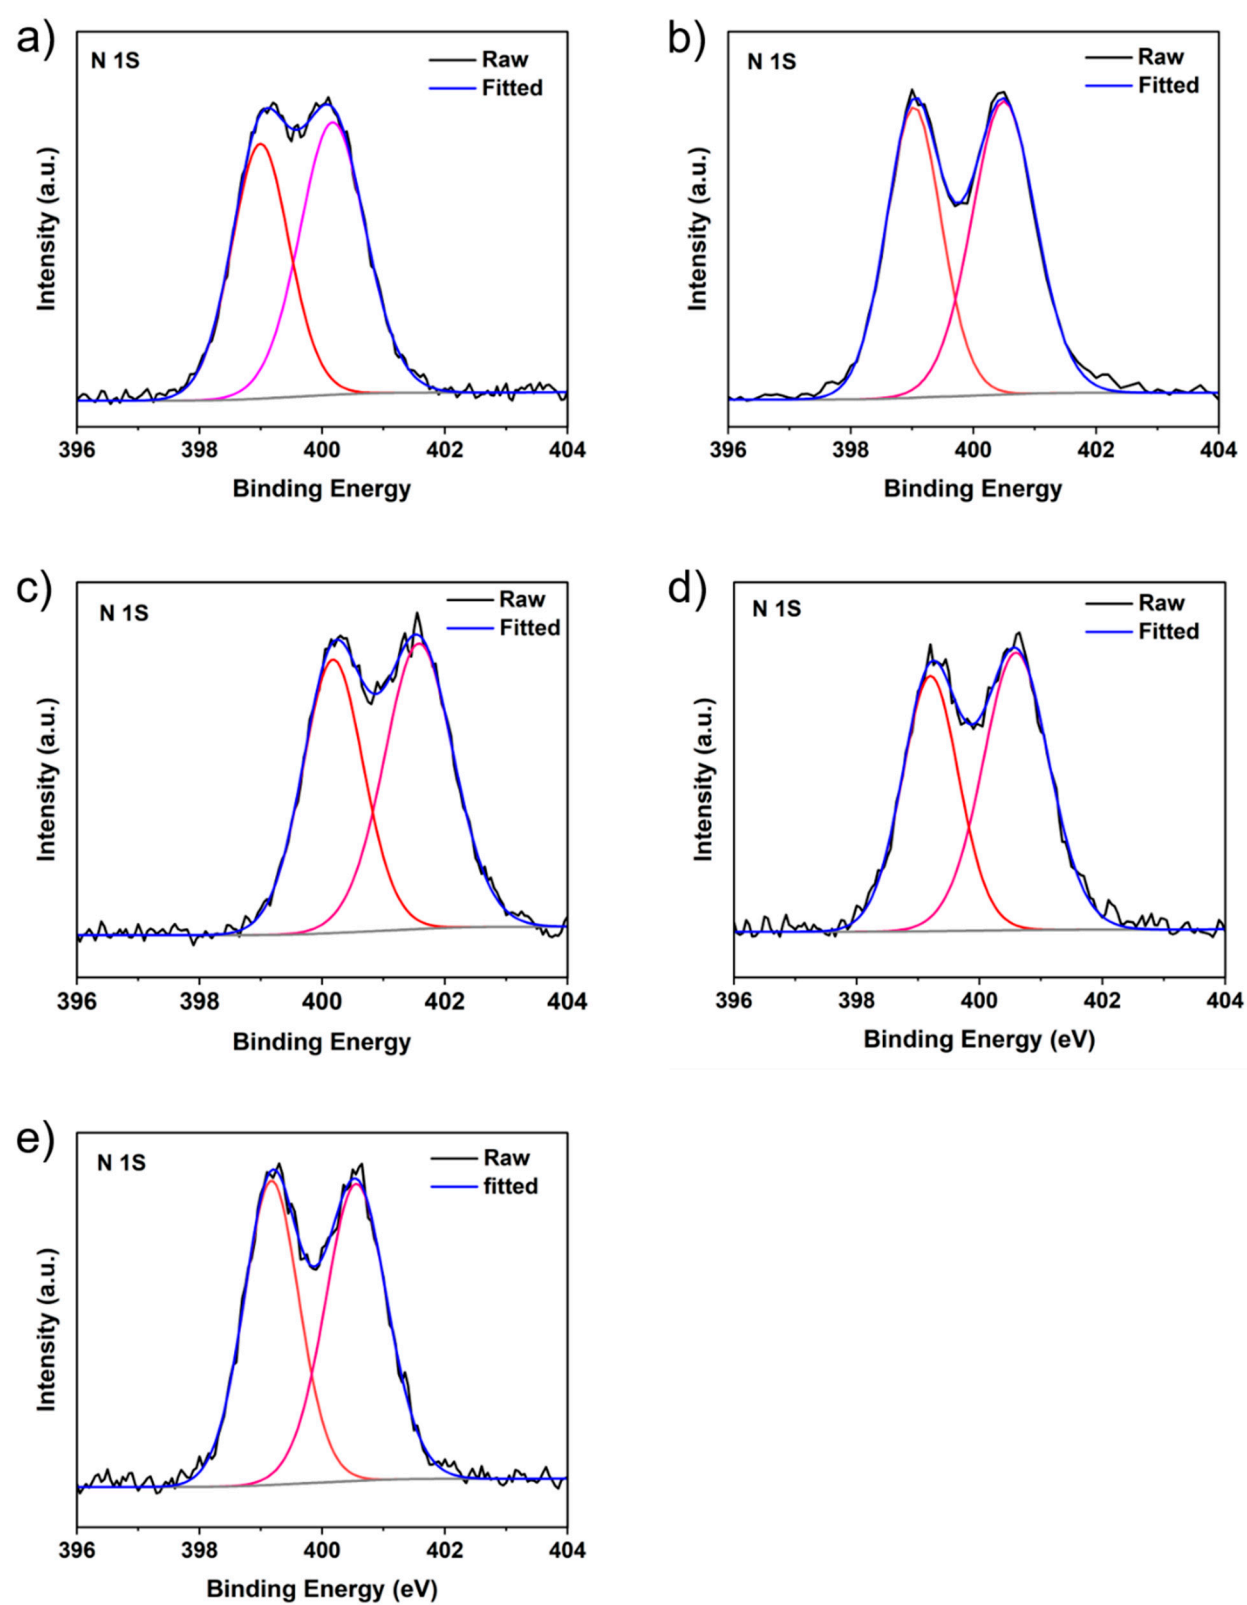

**Figure S5.** N 1s XPS spectrum: (a) Cu-IM, (b) Cu-MIM (c) Cu-EIM, (d) Cu-PIM, and (e) Cu-BIM.

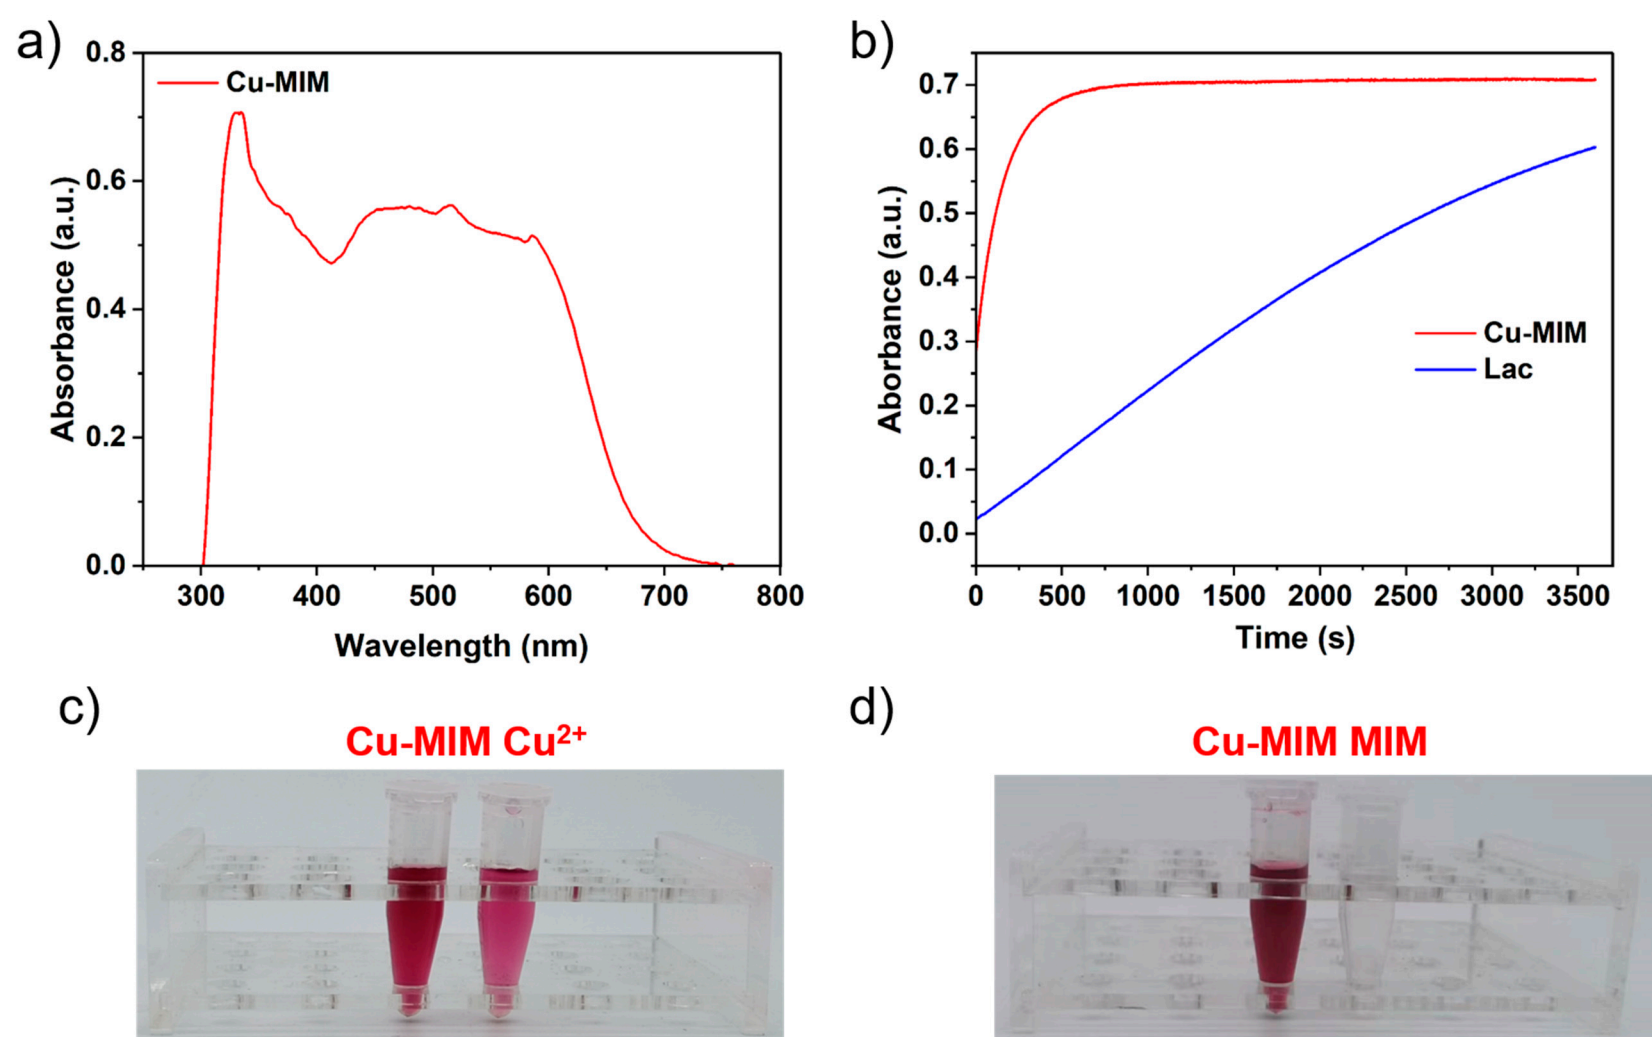

**Figure S6.** Wavelengths of Cu-MIM catalyzed 2, 4-DP and 4-AP reaction (a), product absorbance versus time catalyzed by laccase or Cu-MIM (b), and comparison of reaction catalyzed by Cu-MIM or  $\text{CuCl}_2$  for 20 min (c), (d) comparison of reaction catalyzed by Cu-MIM or 1-Methylimidazole.

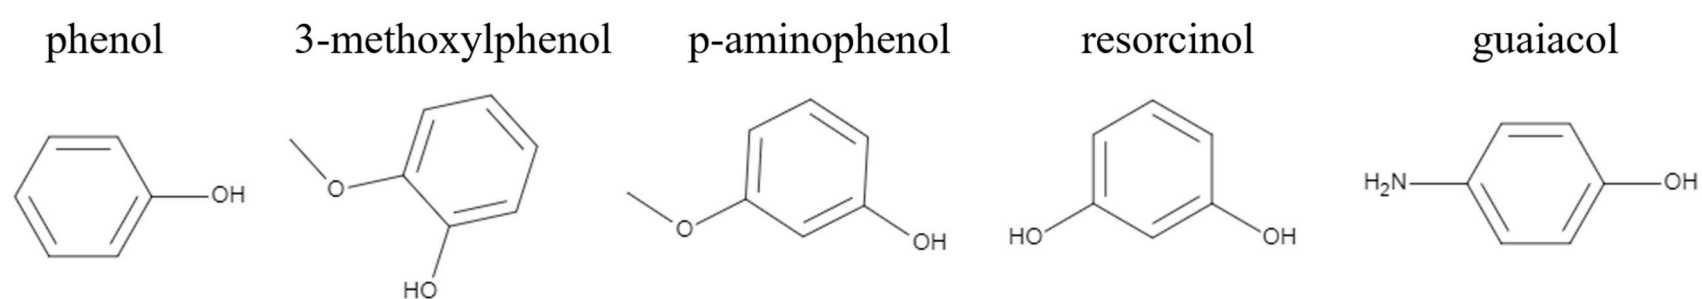

**Figure S7.** Molecular structures of five phenolic compounds.

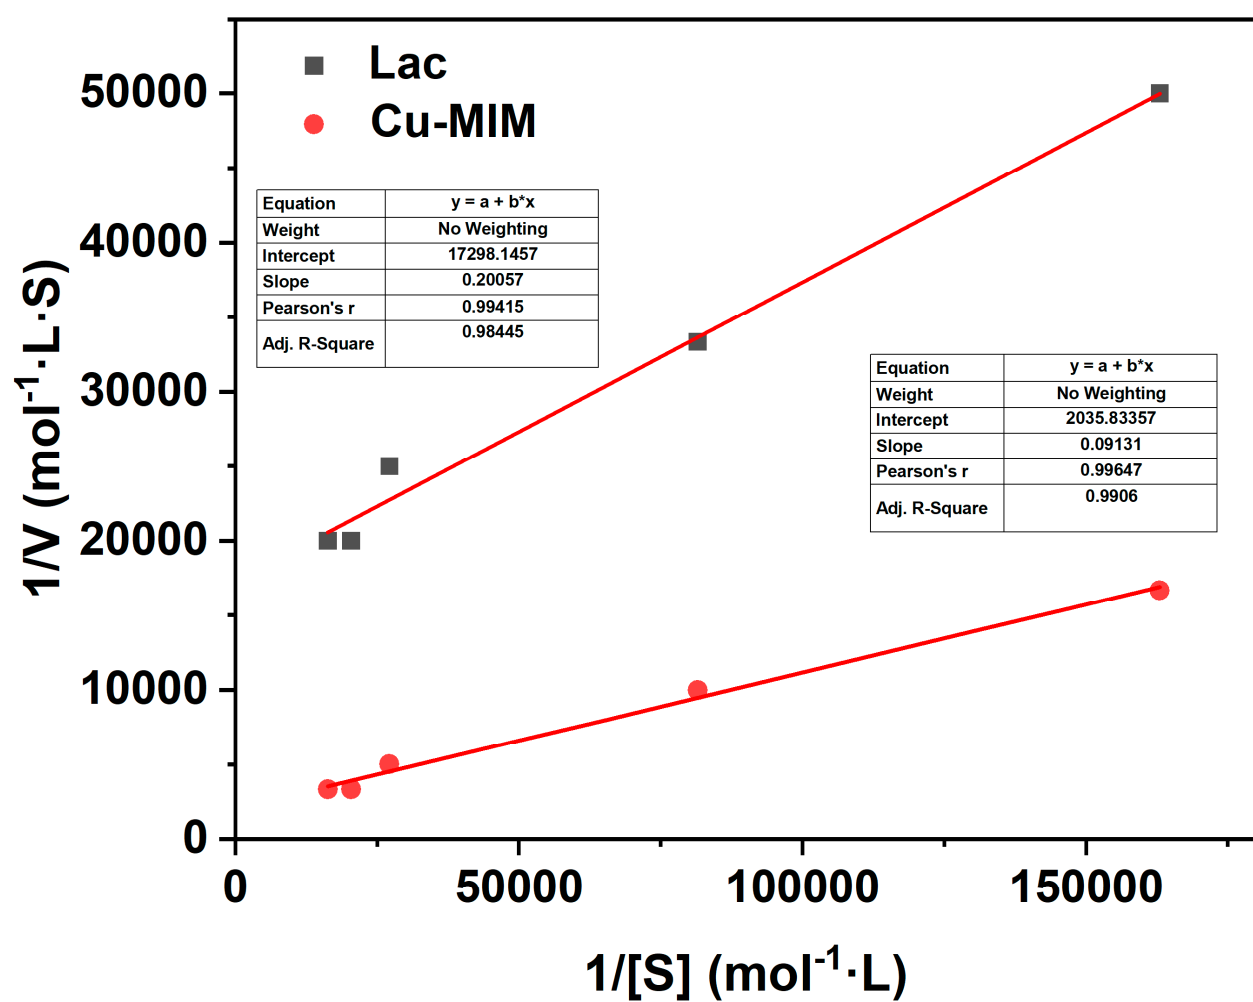

Figure S8. Lineweaver-Burk plot for Cu-MIM nanozyme and laccase oxidizing 2, 4-DP at room temperature.

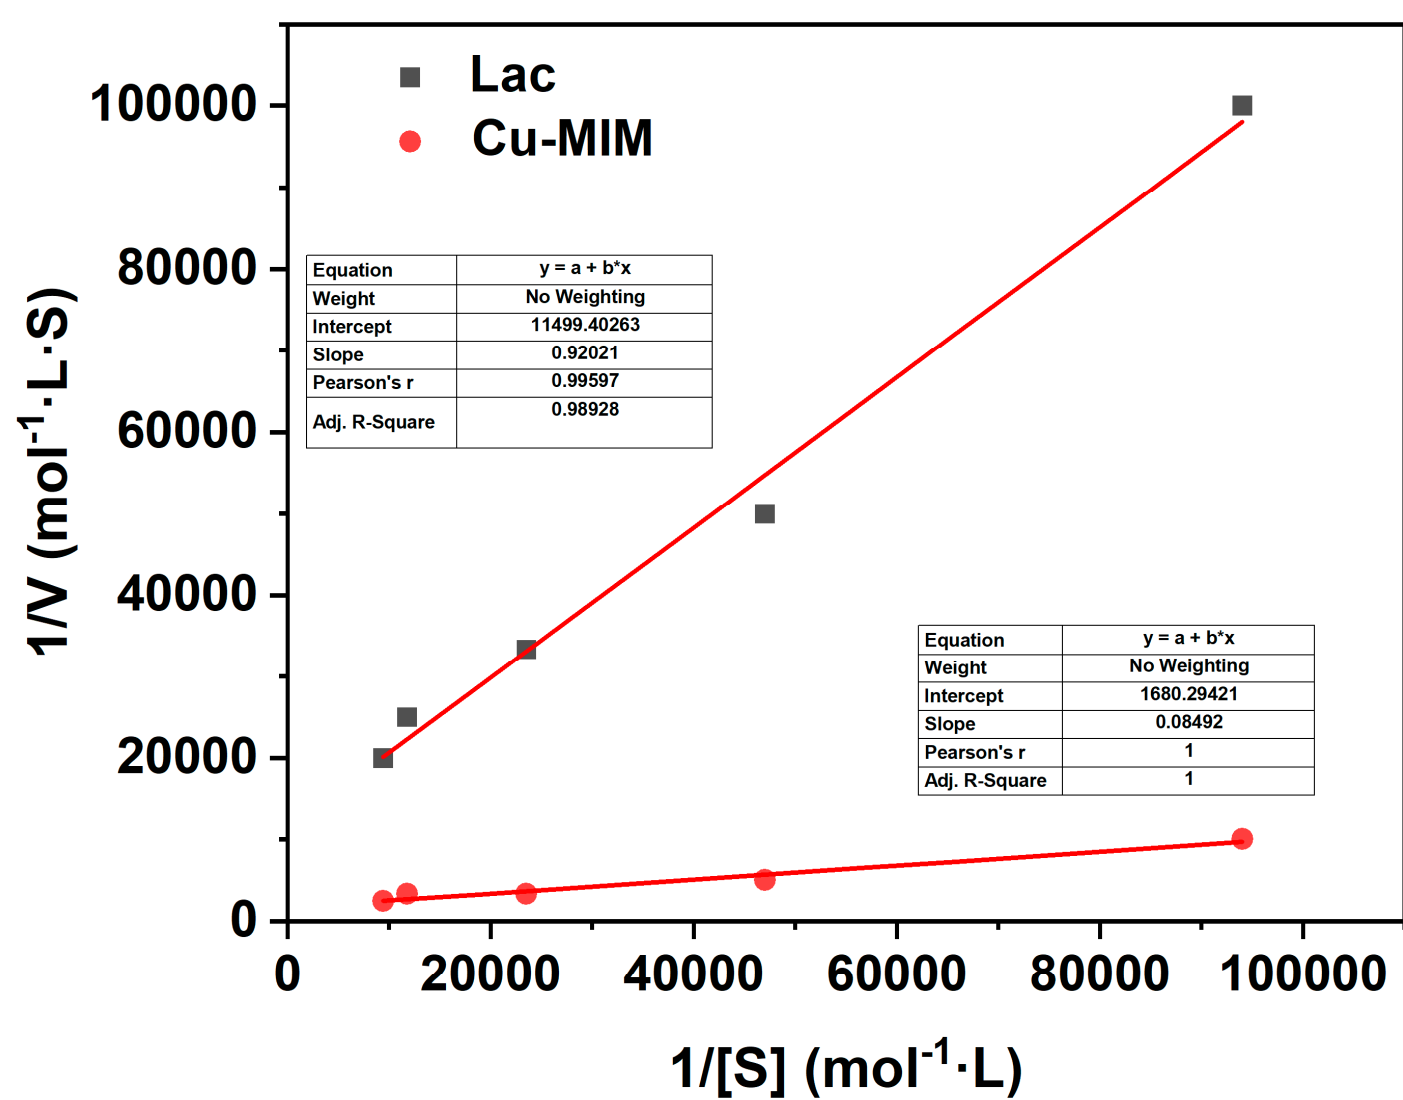

Figure S9. Lineweaver-Burk plot for Cu-MIM nanozyme and laccase oxidizing phenol at room temperature.



**Table S1.** FT-IR spectra of Cu-MIM nanozyme and 1-methylimidazole dipeptide.

| Chemical bond | Cu-MIM nanozyme/cm <sup>-1</sup> | 1-Methylimidazole/cm <sup>-1</sup> |
|---------------|----------------------------------|------------------------------------|
| $\nu(-C=C-H)$ | 3129                             | 3107                               |
| $\nu(-CH_3)$  | 3074                             | 2953                               |
| $\nu(C=N)$    | 1622                             | 1679                               |
| $\nu(C=C)$    | 1598                             | 1590                               |
| $\nu(N-C)$    | 2927                             | 2883                               |
| $\delta(C-H)$ | 670                              | 665                                |

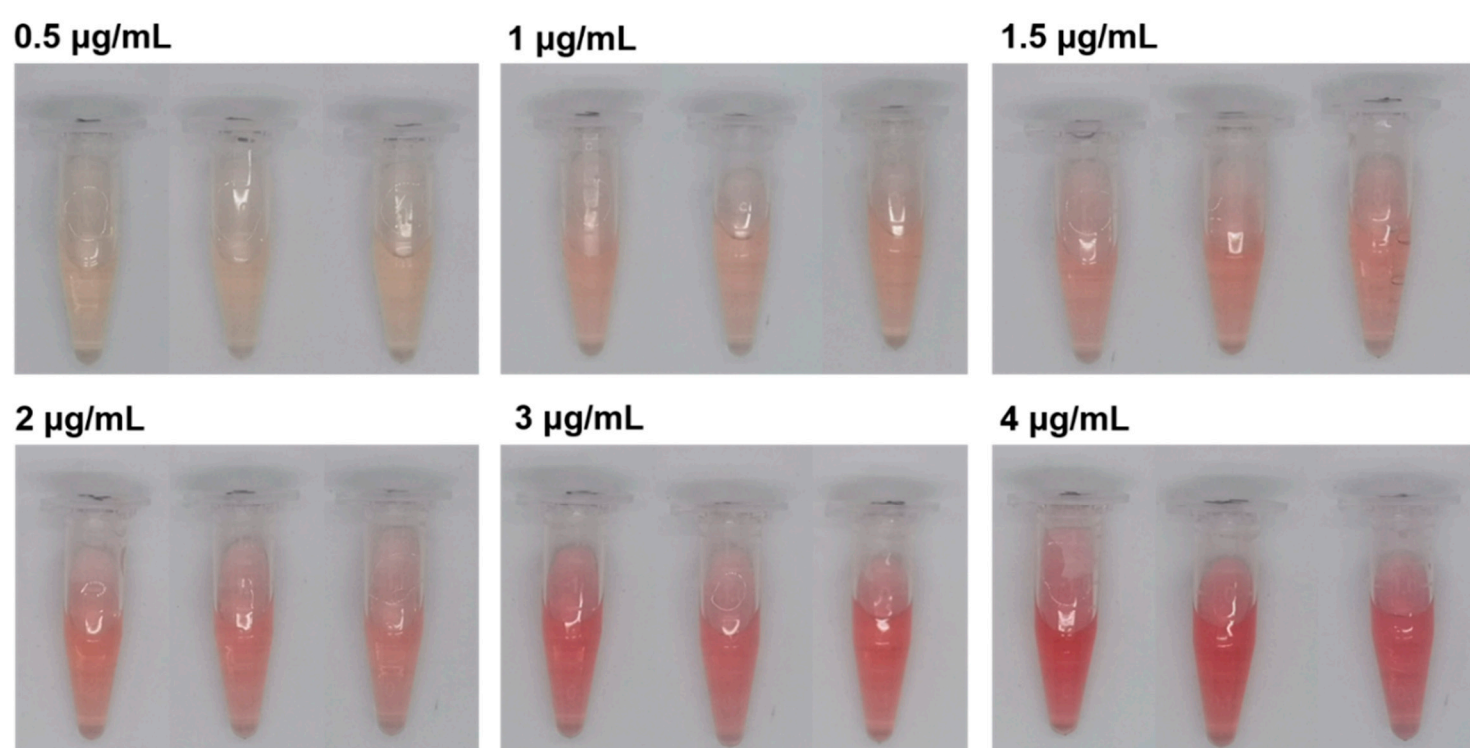

**Figure S10.** Photographs of the reaction of different concentrations of phenol and Cu-MIM nanozymes.

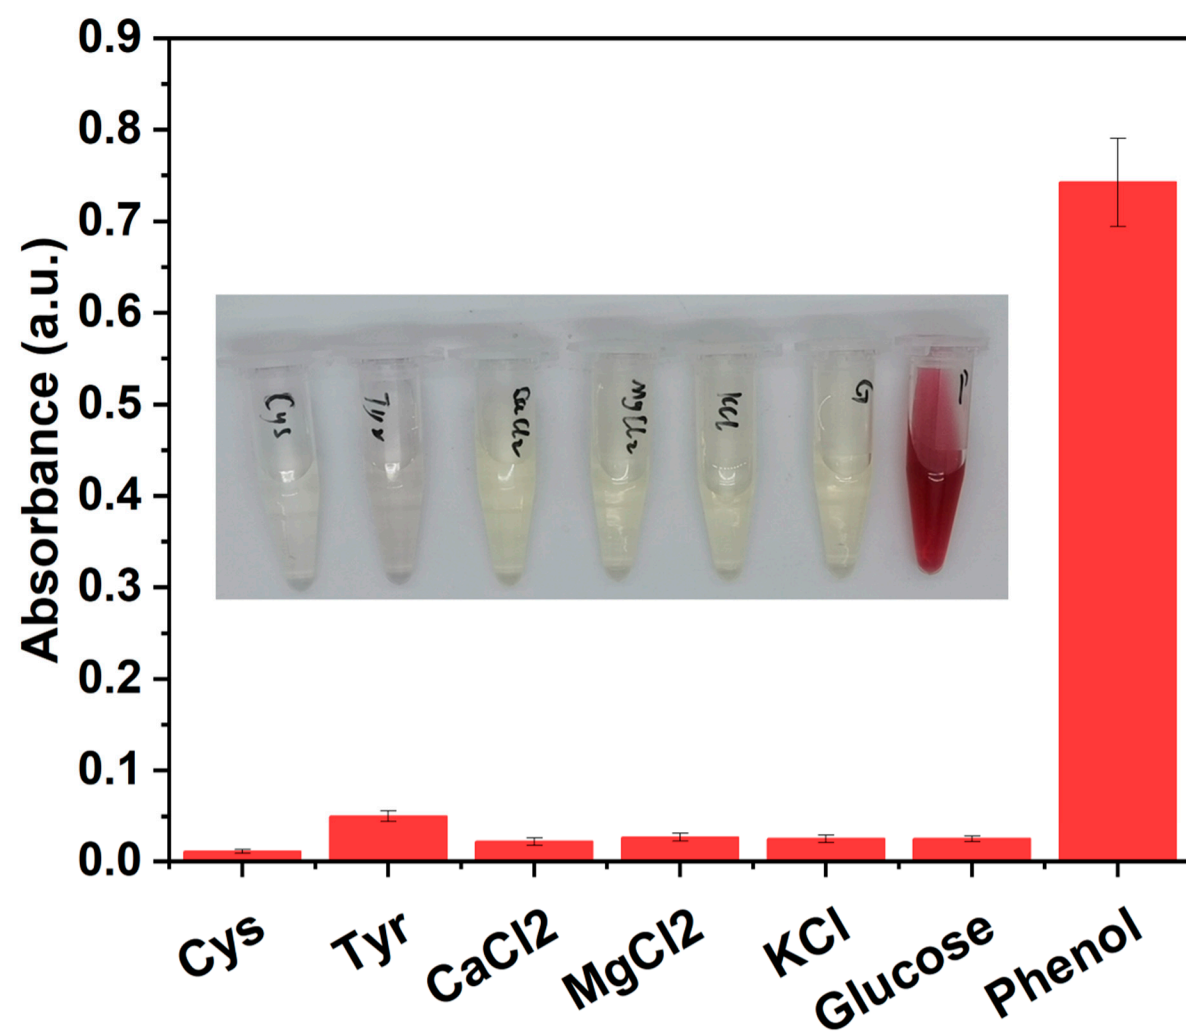

**Figure S11.** The selectivity of Cu-MIM nanozyme towards phenol and other potential interferential substances.

**Table S2.** The RGB values corresponding to the standard color chart of each phenol concentration.

| [S]<br>( $\mu\text{g/mL}$ ) | R1  | G1  | B1  | R2  | G2  | B2  | R3  | G3  | B3  | g1      | g2      | g3      | Mean     | Standard<br>Deviation | CV      |
|-----------------------------|-----|-----|-----|-----|-----|-----|-----|-----|-----|---------|---------|---------|----------|-----------------------|---------|
| 4                           | 154 | 79  | 86  | 157 | 75  | 81  | 158 | 77  | 83  | 102.223 | 100.202 | 101.903 | 101.4427 | 1.0863                | 0.01071 |
| 3                           | 165 | 99  | 101 | 162 | 87  | 91  | 168 | 90  | 90  | 118.962 | 109.881 | 113.322 | 114.055  | 4.58466               | 0.0402  |
| 2                           | 168 | 120 | 116 | 170 | 112 | 110 | 171 | 111 | 103 | 133.896 | 129.114 | 128.028 | 130.346  | 3.12197               | 0.02395 |
| 1.5                         | 174 | 135 | 130 | 165 | 118 | 112 | 168 | 124 | 115 | 146.091 | 131.369 | 136.13  | 137.8633 | 7.5125                | 0.05449 |
| 1                           | 173 | 146 | 137 | 174 | 142 | 131 | 168 | 136 | 123 | 153.047 | 150.314 | 144.086 | 149.149  | 4.59269               | 0.03079 |
| 0.5                         | 169 | 155 | 142 | 173 | 154 | 139 | 175 | 154 | 137 | 157.704 | 157.971 | 158.341 | 158.0053 | 0.31988               | 0.00202 |
